# Supplementary material for: High performance A–D–A oligothiophene-based organic solar cells employing two-step annealing and solution-processable copper thiocyanate (CuSCN) as an interfacial hole transporting layer
Source: Royal Society of Chemistry journal article supplement (doi:10.1039/c6ta07640h), 2016-01-01
Supplement: c6ta07640h1.pdf [file c6ta07640h1.pdf]

## Supporting Information

### **High performance A-D-A oligothiophene-based organic solar cells employing two-step annealing and solution-processable copper thiocyanate (CuSCN) as an interfacial hole transporting layer**

Amaresh Mishra,<sup>\*ad</sup> Tushar Rana,<sup>b</sup> Annika Looser,<sup>a</sup> Matthias Stolte,<sup>c</sup> Frank Würthner,<sup>c</sup> Peter Bäuerle,<sup>a</sup> and Ganesh D. Sharma<sup>\*b</sup>

<sup>a</sup>Institute of Organic Chemistry II and Advanced Materials, University of Ulm, Albert-Einstein-Allee 11, 89081 Ulm, Germany

<sup>b</sup>Department of Physics, The LNM Institute of Information Technology (Deemed University), Rupa ki Nagal, Jamdoli, Jaipur, Rajasthan, 302031, India. Email: gdsharma273@gmail.com

<sup>c</sup>Institut für Organische Chemie & Center for Nanosystems Chemistry, Universität Würzburg Am Hubland 97074, Würzburg, Germany

<sup>d</sup>Current address: School of Chemistry, Sambalpur University, Jyoti Vihar-768019, Sambalpur, India. Email: amaresh.mishra@suniv.ac.in

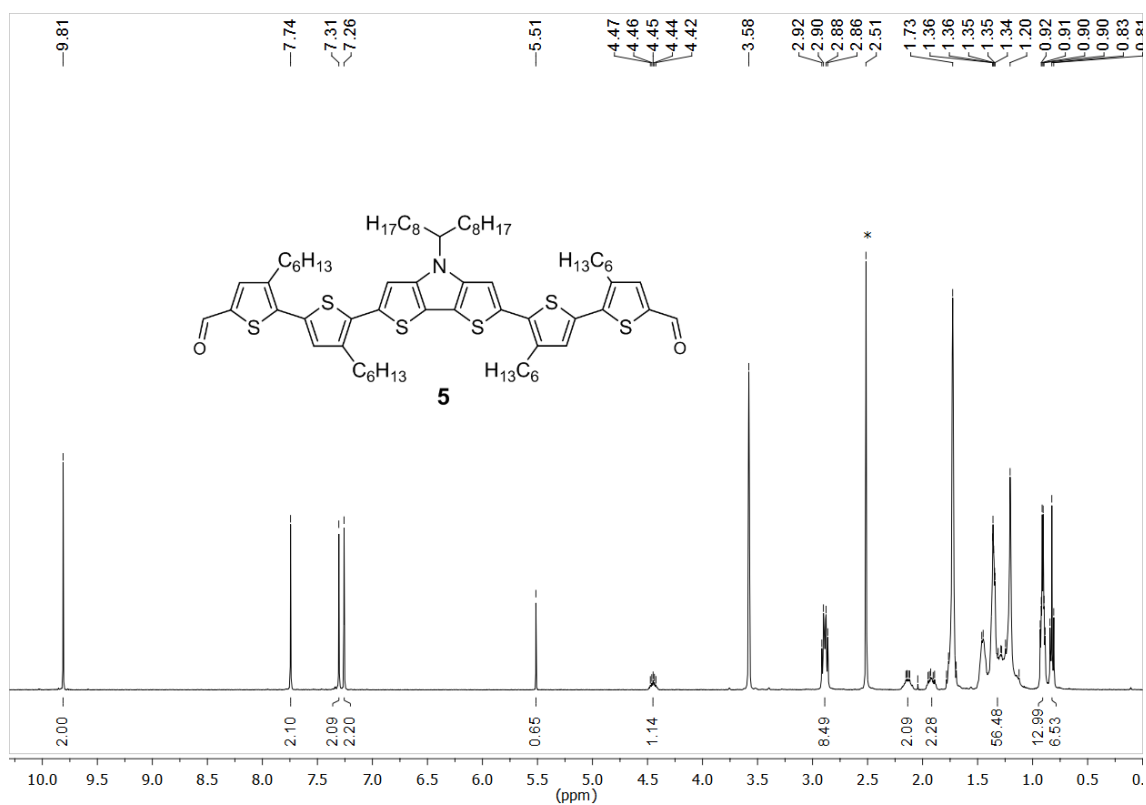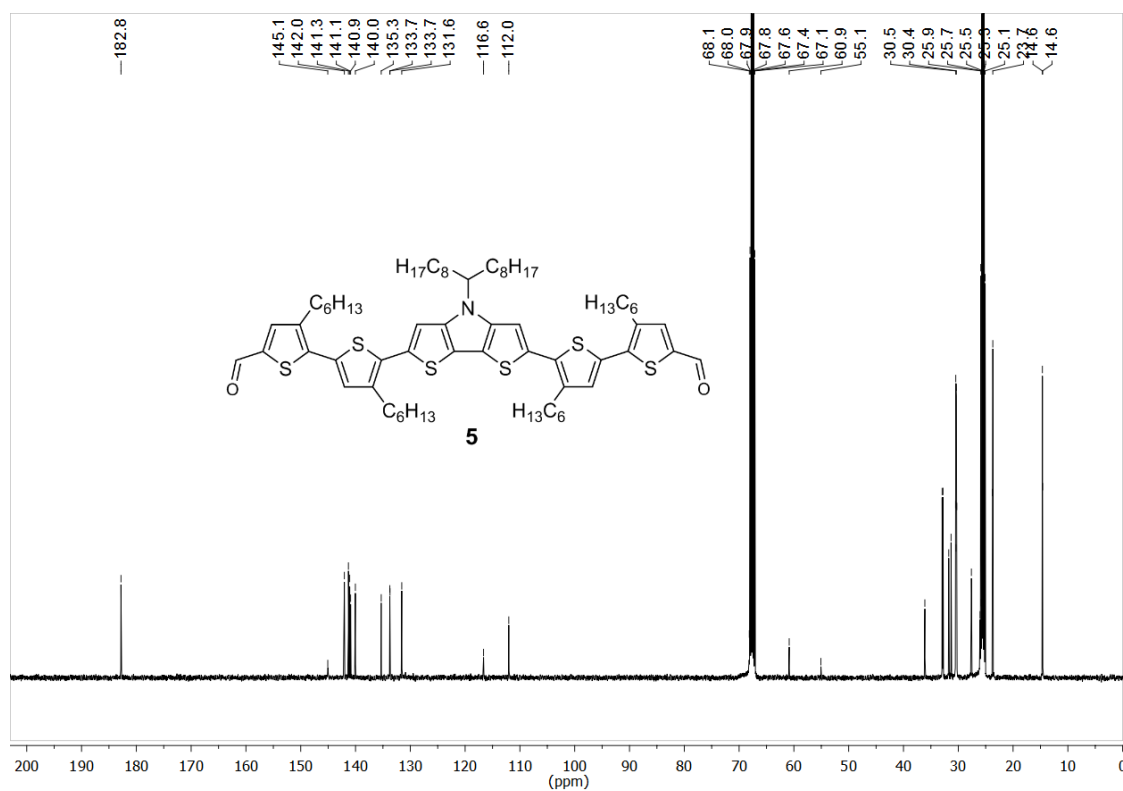

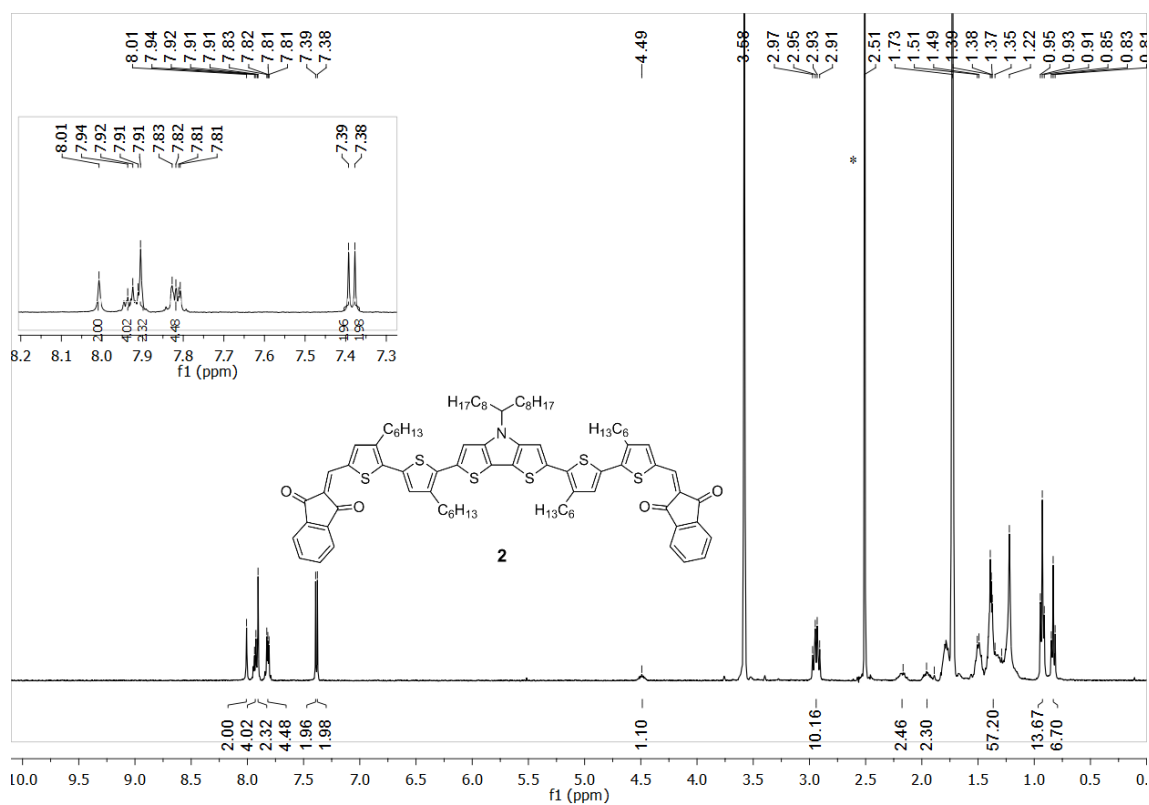

**Figure S3.**  $^1\text{H-NMR}$  spectrum of compound **2** in  $[\text{D}_8]\text{THF}$  (400 MHz). \*solvent impurities.

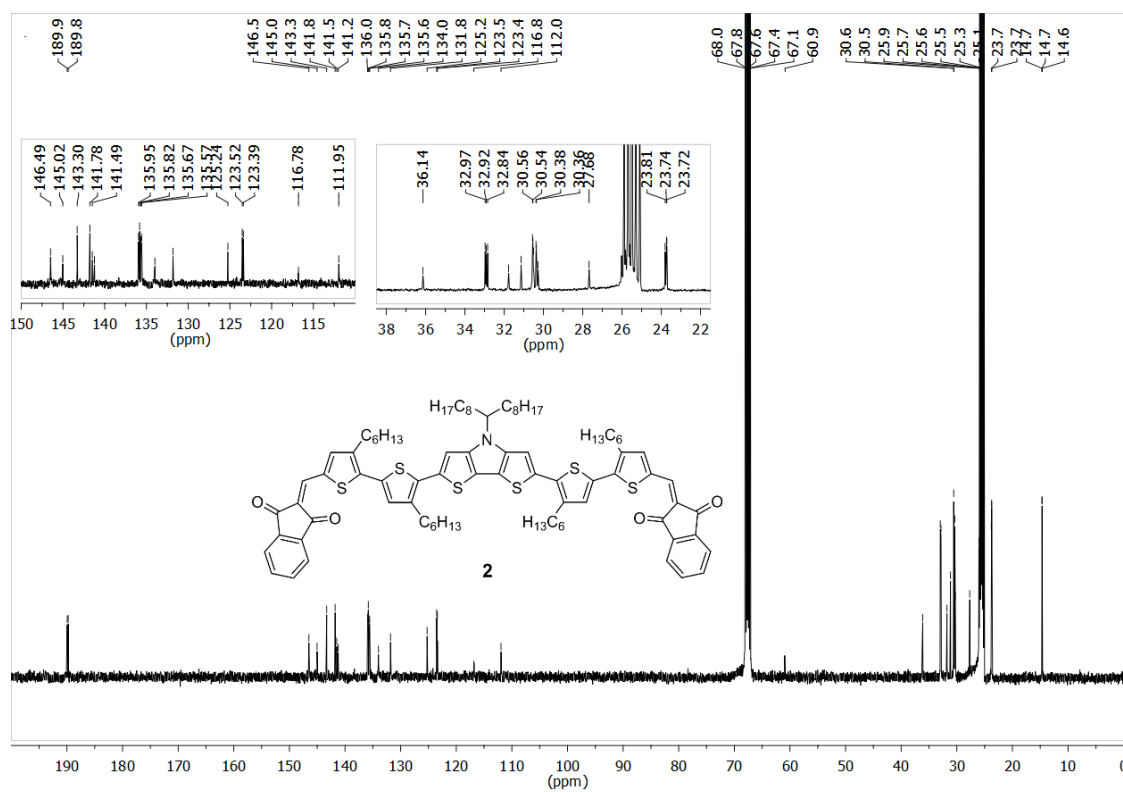

**Figure S4.**  $^{13}\text{C-NMR}$  spectrum of compound **2** in  $[\text{D}_8]\text{THF}$  (100 MHz).
